# Supplementary material
Source: publisher figshare collection journal article supplement (https://acs.figshare.com/ndownloader/files/5659266)

## Supporting Information

### High Affinity InhA Inhibitors With Activity Against Drug Resistant Strains of *Mycobacterium Tuberculosis*

Todd J. Sullivan\*, James J. Truglio<sup>†‡</sup>, Melissa E. Boyne<sup>§</sup>, Polina Novichenok\*, Xujie Zhang\*, Christopher F. Stratton\*, Huei-Jiun Li\*, Tejinder Kaur\*, Amol Amin<sup>§</sup>, Francis Johnson<sup>\*†</sup>, Richard A. Slayden<sup>§¶</sup>, Caroline Kisker<sup>†‡¶</sup> and Peter J. Tonge<sup>\*¶</sup>

\*Department of Chemistry, Stony Brook University, Stony Brook, NY 11794-3400

<sup>†</sup>Department of Pharmacology and <sup>‡</sup>Center for Structural Biology, Stony Brook University, Stony Brook NY 11794-5115

<sup>§</sup>Department of Microbiology, Immunology and Pathology, Colorado State University, Fort Collins, CO 80523-1682

Page 2. Methods used for the synthesis of the alkyl diphenyl ethers.

Page 5. Supplementary Table 1. Data collection and refinement statistics (Molecular Replacement).

Page 6. Supplementary Table 2. Primer Sequences Used for Quantitative Real Time PCR.

Pages 7 – 12. <sup>1</sup>H NMR spectra of 2PP, 4PP, 5PP, 6PP, 8PP and 14PP.

Pages 13 – 18. Mass spectra of 2PP, 4PP, 5PP, 6PP, 8PP and 14PP.

## Synthesis of the Alkyl Diphenyl Ethers.

**Reaction A.** The aryl halide (7.35 mmol), phenol (14.7 mmol),  $\text{Cs}_2\text{CO}_3$  (32.3 mmol),  $(\text{CuOTf})_2 \cdot \text{PhH}$  (0.735 mmol, 5.0 mol % Cu), ethyl acetate (0.125 mmol, 5.0 mol %), 1-naphthoic acid (32.3 mmol), molecular sieves 4 Å (1.8 g) and toluene (15 mL) were added to a oven-dried 50 mL two-necked round-bottomed flask sealed with a septum which was purged with nitrogen, and heated to 110 °C under nitrogen. Upon cooling to RT, dichloromethane was added and the organic phase was obtained by filtration. This solution was washed with 5% NaOH. The aqueous layer was then extracted with dichloromethane and the combined organic layers were washed with brine, dried over  $\text{Mg}_2\text{SO}_4$  and concentrated under vacuum to give the crude product. This was then purified by flash chromatography on silica gel (5% ethyl acetate/hexane).

**Reaction B.**  $\text{ZnCl}_2$  (0.5 M solution in tetrahydrofuran; 9.0 mL, 4.52 mmol) was added by syringe to a round bottom flask sealed with a rubber septum and purged with nitrogen. The appropriate alkyl magnesium chloride or alkyl magnesium bromide (1.0 M solution in THF; 4.0 mL, 4.26 mmol) was then added dropwise by syringe, and the resulting solution was stirred at room temperature for 20 min. *N*-methylpyrrolidinone (4.7 mL) was then added to the flask by syringe, followed by 21.7 mg (0.0426 mmol) of  $\text{Pd}(\text{P}(t\text{-Bu})_3)_2$  and 500 mg (2.13 mmol) of 4-chloro-2-methoxy-1-phenoxybenzene after 5 min. The flask was then fitted with a reflux condenser and refluxed for 48 h at 130 °C. The flask was then gradually cooled to RT, and 20 mL of a 1.0 M aqueous HCl solution was added. The resulting mixture was extracted with diethyl ether, the ether extract was washed with water, and then the organic layer was dried over anhydrous  $\text{MgSO}_4$  and concentrated under vacuum to give the crude product. This was then purified by flash chromatography on silica gel (5% ethyl acetate/hexane).

**Reaction C.** A solution of 455 mg (1.8 mmol) boron tribromide in 1.8 mL of dichloromethane (1.0 M solution) was added to a solution of the 4-substituted-2-methoxy-1-phenoxy-benzene (1.4 mmol) in 3 mL of dry dichloromethane at -70 °C under nitrogen. The reaction mixture was stirred at -70 °C for 1 h and then at RT for 3 h. When TLC analysis showed that the reaction had reached completion, the reaction mixture was quenched with methanol at -70 °C and concentrated to give an oil. A suspension of this oil in dichloromethane was washed with 10 % aqueous sodium bicarbonate solution and the organic layer was drawn off, washed sequentially with water then brine and dried over  $\text{MgSO}_4$ . The organic layer was filtered, concentrated under vacuo to give the crude product which was then purified by flash chromatography on silica gel (5% ethyl acetate/hexane).

**1-(4-Ethyl-2-methoxyphenoxy)benzene.** Reaction A was used to convert 4-ethyl-2-methoxyphenol and iodobenzene to the title product: yellow liquid (48%);  $^1\text{H}$  NMR (200MHz) ( $\text{CDCl}_3$ )  $\delta$  7.50-6.81 (m,8H), 3.86 (s,3H), 2.77-2.68 (q,3H), 1.38-1.31 (t,3H).

**5-Ethyl-2-phenoxyphenol (2PP).** Reaction C was used to convert 1-(4-ethyl-2-methoxyphenoxy)benzene to the title product. Flash chromatography gave the product as a light brown oil (68%). The identify of the product was verified by NMR and EI-MS methods and the purity of the product was estimated at >97% by NMR spectroscopy. Relevant NMR and EI-MS spectra are presented below.  $^1\text{H}$  NMR (300MHz) ( $\text{CDCl}_3$ )  $\delta$  7.39-7.34 (m, 2H), 7.17-7.11 (m, 1H), 7.07-7.03 (m,2H), 6.97-6.96 (d,1H), 6.88-6.86 (d,1H), 6.76-6.71 (d,1H), 5.67 (s,1H), 2.70-2.62 (q, 2H), 1.32-1.27 (t, 3H); HRMS (EI-MS  $\text{M}^+$ ) calculated for  $\text{C}_{14}\text{H}_{14}\text{O}_2$  214.0994, found 214.0986.

**4-Chloro-2-methoxy-1-phenoxy-benzene.** Reaction A was used to convert 4-chloro-2-methoxyphenol and iodobenzene to the title compound: white solid (53%);  $^1\text{H}$  NMR (250 MHz) ( $\text{CDCl}_3$ )  $\delta$  7.35-

6.94 (m, 8H), 3.87 (s, 3H);  $^{13}\text{C}$  NMR (250 MHz,  $\text{CDCl}_3$ )  $\delta$  157.55, 151.88, 143.73, 129.53, 122.69, 121.66, 120.79, 118.80, 116.40, 113.33, 56.06; HRMS (EI-MS  $\text{M}^+$ ) calculated for  $\text{C}_{13}\text{H}_{11}\text{ClO}_2$  234.0447, found 234.0443.

**4-Butyl-2-methoxy-1-phenoxybenzene.** Reaction B was used to couple butyl-magnesium chloride and 4-chloro-2-methoxy-1-phenoxybenzene to the title compound: light brown oil (31%);  $^1\text{H}$  NMR (300MHz) ( $\text{CDCl}_3$ )  $\delta$  7.41-7.29 (m, 3H), 7.22-7.13 (m, 1H), 7.09-6.93 (m, 5H), 6.88-6.87 (d, 1H), 6.83-6.79 (dd, 1H), 3.88 (s, 3H), 2.67-2.66 (t, 1.4H), 1.75-1.64 (m, 1.5H), 1.47-1.39 (m, 1.6H), 1.03-0.98 (t, 2H).

**5-Butyl-2-phenoxyphenol (4PP).** Reaction C was used to convert 4-butyl-2-methoxy-1-phenoxybenzene to the title compound. Flash chromatography gave the product as a clear light yellow oil (82%). The identify of the product was verified by NMR and EI-MS methods and the purity of the product was estimated at 99% by NMR spectroscopy. Relevant NMR and EI-MS spectra are presented below.  $^1\text{H}$  NMR (300MHz) ( $\text{CDCl}_3$ )  $\delta$  7.45-7.36 (t, 2H), 7.23-7.15 (t, 1H), 7.12-7.05 (d, 2H), 6.95 (s, 1H), 6.88-6.79 (d, 1H), 6.67-6.65 (dd, 1H), 5.58 (s, 1H), 2.67-2.61 (t, 2H), 1.75-1.64 (m, 2H), 1.43-1.30 (m, 2H), 0.96-0.91 (t, 3H); HRMS (EI-MS  $\text{M}^+$ ) calculated for  $\text{C}_{16}\text{H}_{18}\text{O}_2$  242.1307, found 242.1311.

**2-Methoxy-4-pentyl-1-phenoxybenzene.** Reaction B was used to convert pentyl-magnesium chloride and 4-chloro-2-methoxy-1-phenoxybenzene to the title compound: light brown oil (26%);  $^1\text{H}$  NMR (300MHz) ( $\text{CDCl}_3$ )  $\delta$  7.38-7.32 (m, 2H), 7.13-7.06 (m, 1H), 7.04-6.97 (m, 3H), 6.92-6.91 (d, 1H), 6.84-6.80 (dd, 1H), 3.91 (s, 3H), 2.71-2.68 (t, 2H), 1.72-1.68 (m, 2H), 1.47-1.44 (m, 4H), 1.03-1.00 (t, 3H).

**5-Pentyl-2-phenoxyphenol (5PP).** Reaction C was used to convert 2-methoxy-4-pentyl-1-phenoxybenzene to the title compound. Flash chromatography gave the product as a clear light yellow oil (77%). The identify of the product was verified by NMR and EI-MS methods and the purity of the product was estimated at 99% by NMR spectroscopy. Relevant NMR and EI-MS spectra are presented below.  $^1\text{H}$  NMR (300MHz) ( $\text{CDCl}_3$ )  $\delta$  7.37-7.31 (m, 2H), 7.14-7.01 (m, 4H), 6.92-6.91 (s, 1H), 6.85-6.82 (d, 1H), 6.70-6.67 (dd, 1H), 5.58 (s, 1H), 2.61-2.56 (t, 2H), 1.67-1.62 (m, 2H), 1.39-1.34 (m, 4H), 0.96-0.92 (t, 3H). HRMS (EI-MS  $\text{M}^+$ ) calculated for  $\text{C}_{17}\text{H}_{20}\text{O}_2$  256.1463, found 256.1459.

**1-(2-Methoxy-4-hexylphenoxy)benzene.** Reaction B was used to convert hexyl-magnesium bromide and 4-chloro-2-methoxy-1-phenoxybenzene to the title compound: clear oil (28%);  $^1\text{H}$  NMR (300MHz) ( $\text{CDCl}_3$ )  $\delta$  7.36-6.80 (m, 8H), 3.90 (s, 3H), 2.71-2.66 (t, 2H), 1.74-1.67 (m, 2H), 1.42-1.33 (m, 6H), 1.01-0.97 (t, 3H).

**5-Hexyl-2-phenoxyphenol (6PP).** Reaction C was used to convert 1-(4-hexyl-2-methoxyphenoxy)benzene to the title product. Flash chromatography gave the product as a clear light yellow oil (86%). The identify of the product was verified by NMR and EI-MS methods and the purity of the product was estimated at 99% by NMR spectroscopy. Relevant NMR and EI-MS spectra are presented below.  $^1\text{H}$  NMR (300MHz) ( $\text{CDCl}_3$ )  $\delta$  7.35-7.31 (t, 2H), 7.11-7.07 (t, 1H), 7.02-7.0 (t, 2H), 6.88 (d, 1H), 6.82-6.80 (d, 1H), 6.67-6.65 (dd, 1H), 5.48 (s, 1H), 2.58-2.54 (t, 2H), 1.65-1.59 (m, 2H), 1.35-1.27 (m, 6H), 0.91-0.88 (t, 3H). HRMS (EI-MS  $\text{M}^+$ ) calculated for  $\text{C}_{18}\text{H}_{22}\text{O}_2$  270.1620, found 270.1615.

**1-(2-Methoxy-4-octylphenoxy)benzene.** Reaction B was used to convert octyl-magnesium chloride and 4-chloro-2-methoxy-1-phenoxybenzene to the title compound: clear oil (73%);  $^1\text{H}$  NMR

(300MHz) ( $\text{CDCl}_3$ )  $\delta$  7.36-6.90 (m,8H), 3.90 (s,3H), 2.69-2.65 (t,2H), 1.72-1.68 (m,2H), 1.42-1.36 (m,10H), 1.00-0.94 (t,3H).

**5-Octyl-2-phenoxyphenol (8PP)** Reaction C was used to convert 1-(2-methoxy-4-octylphenoxy)benzene to the title compound. Flash chromatography gave the product as a clear light yellow oil (84%). The identify of the product was verified by NMR and EI-MS methods and the purity of the product was estimated at 99% by NMR spectroscopy. Relevant NMR and EI-MS spectra are presented below.  $^1\text{H}$  NMR (300MHz) ( $\text{CDCl}_3$ )  $\delta$  7.35-7.31 (m,2H), 7.11-7.07 (t,1H), 7.02-7.0 (t,2H), 6.89-6.88 (d,1H), 6.82-6.80 (d,1H), 6.67-6.65 (dd,1H), 5.48 (s, 1H), 2.58-2.54 (t,2H), 1.63-1.59 (m,2H), 1.39-1.30 (m,10H), 0.91-0.88 (t,3H). HRMS (EI-MS  $\text{M}^+$ ) calculated for  $\text{C}_{20}\text{H}_{26}\text{O}_2$  298.1933, found 298.1932.

**2-Methoxy-1-phenoxy-4-tetradecylbenzene.** Reaction B was used to convert tetradecylmagnesium chloride and 4-chloro-2-methoxy-1-phenoxy-benzene to the title compound: light brown oil (65 %);  $^1\text{H}$  NMR (300MHz) ( $\text{CDCl}_3$ )  $\delta$  7.43-7.32 (m,2.6 H), 7.20-7.06 (m,2H), 7.03-6.97 (m,3H), 6.90-6.89 (d,1H), 6.82-6.79 (dd,1H), 3.89 (s, 3H), 2.70-2.65 (t,2H), 1.73-1.62 (m,2.3H), 1.40-1.38 (m,25H), 0.98-0.94 (t,3.6H). ESI-MS calculated for  $\text{C}_{27}\text{H}_{40}\text{O}_2$  396.61, found 269.2, 327.1, 397.3, 411.2.

**5-Tetradecyl-2-phenoxyphenol (14PP)** Reaction C was used to convert 2-methoxy-1-phenoxy-4-tetradecylbenzene to the title compound. Flash chromatography gave the product as a clear light yellow oil (82%). The identify of the product was verified by NMR and EI-MS methods and the purity of the product was estimated at 99% by NMR spectroscopy. Relevant NMR and EI-MS spectra are presented below.  $^1\text{H}$  NMR (300MHz) ( $\text{CDCl}_3$ )  $\delta$  7.33-7.30 (m,2H), 7.12-7.07 (m,1H), 7.02-6.99 (m,2H), 6.89-6.88 (d,1H), 6.82-6.80 (d,1H), 6.68-6.64 (dd,1H), 5.43 (s, 1H), 2.55 (t,2H), 1.64-1.59 (m,2H), 1.33-1.27 (m,24H), 0.91-0.87 (t,3H). HRMS (EI-MS  $\text{M}^+$ ) calculated for  $\text{C}_{26}\text{H}_{38}\text{O}_2$  382.2872, found 382.2868.

**Supplementary Table 1. Data collection and refinement statistics (Molecular Replacement)**

|                                                     | 5-Octyl-2-phenoxyphenol (8PP) | 5-Pentyl-2-phenoxyphenol (5PP) | Triclosan (TCN)       |
|-----------------------------------------------------|-------------------------------|--------------------------------|-----------------------|
| <b>Data collection</b>                              |                               |                                |                       |
| Space group                                         | C222 <sub>1</sub>             | C2                             | C2                    |
| Cell dimensions                                     |                               |                                |                       |
| <i>a</i> , <i>b</i> , <i>c</i> (Å)                  | 82.3, 100.3, 379.3            | 100.2, 82.1, 189.8             | 100.0, 81.8, 188.7    |
| $\alpha$ , $\beta$ , $\gamma$ (°)                   | 90.0, 90.0, 90.0              | 90.0, 95.4, 90.0               | 90.0, 95.7, 90.0      |
| Resolution (Å)                                      | 40-2.6 (2.7-2.6)              | 40-2.8 (2.9-2.8)               | 50-2.3 (2.4-2.3)      |
| <i>R</i> <sub>sym</sub>                             | 11.2 (45.7)                   | 11.9 (35.0)                    | 10.3 (18.6)           |
| <i>I</i> / $\sigma$ <i>I</i>                        | 13.3 (3.3)                    | 16.1 (4.3)                     | 16.0 (7.4)            |
| Completeness (%)                                    | 96.4 (97.3)                   | 98.4 (93.9)                    | 90.0 (84.1)           |
| Redundancy                                          | 3.6 (3.6)                     | 7.5 (6.7)                      | 2.6 (2.5)             |
| <b>Refinement</b>                                   |                               |                                |                       |
| Resolution (Å)                                      | 2.6                           | 2.8                            | 2.3                   |
| No. reflections                                     | 44,393                        | 37,542                         | 60,723                |
| <i>R</i> <sub>work</sub> / <i>R</i> <sub>free</sub> | 22.8 / 28.8                   | 24.2 / 29.5                    | 26.8 / 33.3           |
| No. atoms                                           |                               |                                |                       |
| Protein                                             | 11,398                        | 11,463                         | 11,271                |
| Ligand/ion                                          | 264 (NAD) 40 (8PP)            | 264 (NAD) 114 (5PP)            | 264 (NAD) 102 (TCL)   |
| Water                                               |                               |                                |                       |
| <i>B</i> -factors                                   |                               |                                |                       |
| Protein                                             | 40.5                          | 32.5                           | 32.6                  |
| Ligand/ion                                          | 38.1 (NAD) 37.9 (8PP)         | 26.9 (NAD) 35.0 (5PP)          | 32.4 (NAD) 53.3 (TCL) |
| Water                                               | 25.0                          | -                              | -                     |
| R.m.s. deviations                                   |                               |                                |                       |
| Bond lengths (Å)                                    | 0.016                         | 0.016                          | 0.014                 |
| Bond angles (°)                                     | 1.4                           | 1.5                            | 1.5                   |

**Supplementary Table 1 Legend**

$R_{\text{sym}} = \sum hkl \sum i |I_i - \langle I \rangle| / \sum hkl \sum i \langle I \rangle$  where  $I_i$  is the  $i^{\text{th}}$  measurement and  $\langle I \rangle$  is the weighted mean of all measurements of  $I$ .  $\langle I \rangle / \langle \sigma I \rangle$  indicates the average of the intensity divided by its average standard deviation. Numbers in parentheses refer to the respective highest resolution data shell in each data set.  $R_{\text{cryst}} = \sum ||F_o| - |F_c|| / \sum |F_o|$  where  $F_o$  and  $F_c$  are the observed and calculated structure factor amplitudes.  $R_{\text{free}}$  same as  $R_{\text{cryst}}$  for 5% of the data randomly omitted from the refinement. Ramachandran statistics indicate the fraction of residues in the most favored, additionally allowed, generously allowed, and disallowed regions of the Ramachandran diagram, as defined by the program PROCHECK (1).

1. Laskowski, R. A., Macarthur, M. W., Moss, D. S., and Thornton, J. M. (1993) Procheck - a program to check the stereochemical quality of protein structures. *J. Appl. Crystallogr.* 26, 283-291.

**Supplementary Table 2. Primer Sequences Used for Quantitative Real Time PCR.**

| A. Gene <sup>a</sup> | Forward Primer       | Reverse Primer        |
|----------------------|----------------------|-----------------------|
| <i>sigA</i>          | TTCGCGCCTACCTCAAACAG | GCTAGCTCGACCTCTTCCTCG |
| <i>fabD</i>          | ACCCTGGTCTCCCAGCTCAC | AGTTCGCGTTTGGCGATACC  |
| <i>kasA</i>          | TGCTCATCGAGACGGAGGAG | CTACCGGCACGAACACCATC  |
| <i>rv1685c</i>       | ACTTCGGCACCAAACAGCAG | AACCGAGTTCCTCGACAGGC  |
| <i>rv1687c</i>       | GGTCGGGCAAGACAACACTG | AGAGTTCGGCGAAGTAGCGG  |
| <i>rv3160c</i>       | CTGGACTACCTGCATGCTTC | CCATCTCCGCGACTAGCTCC  |
| <i>rv3161c</i>       | CAGGGTTCCTTCAGCGTTC  | GCGGAATAAAGCCGAACCAC  |

  

| B. Gene <sup>b</sup> | Forward Primer       | Reverse Primer       |
|----------------------|----------------------|----------------------|
| <i>dnaA</i>          | GCATTCAAACGCAGCTACCG | TGTTGGCATTGTGCAAGGTG |
| <i>rv0077c</i>       | TGACGTGTTCTTCGCACTCG | GGGGAATCCACCATCGAGAA |
| <i>rv0711</i>        | GCCCTGACCAATGTGCTGAC | CGGTGACCTGGGTGATGGTA |
| <i>rv1072</i>        | GGTGAAGGCTTGGGCTTACG | ATCTGATCAGCCGCATCGAA |
| <i>inhA</i>          | CGATCGGCTGGAACATGAAG | CCGTCGGCGTAGATGATGTC |
| <i>rv1557</i>        | GGAAGTGGCGCTGGCTAACT | CGGCGGCAGATAGAAGGAGT |
| <i>rv1686c</i>       | CATTGTGGCGTTCTGGTTCC | AATAGACCGAGCCCGACACC |
| <i>rv2253</i>        | GACACCGCAAGAAGGCAATG | TCACGAGGTACTGCCCGTTC |
| <i>rv3486</i>        | ATTGTCTGCGGCACACTGGT | TGCAGTGCTCGGAGTTTGGT |

**Supplementary Table 2 Legend**

<sup>a</sup>Primer sequences obtained from Betts et al. (2) and B. Primers designed using the Primer3 website (<http://frodo.wi.mit.edu/cgi-bin/primer3/primer3-www.cgi>)

2. Betts, J. C., McLaren, A., Lennon, M. G., Kelly, F. M., Lukey, P. T., Blakemore, S. J., and Duncan, K. (2003) Signature gene expression profiles discriminate between isoniazid-, thiolactomycin-, and triclosan-treated *Mycobacterium tuberculosis*. *Antimicrob. Agents Chemother.* 47, 2903-13.

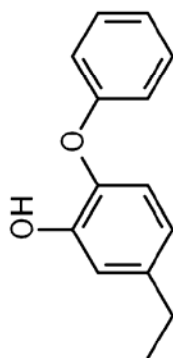

2PP: 5-Ethyl-2-phenoxyphenol

$^1\text{H}$  NMR (300MHz) ( $\text{CDCl}_3$ )

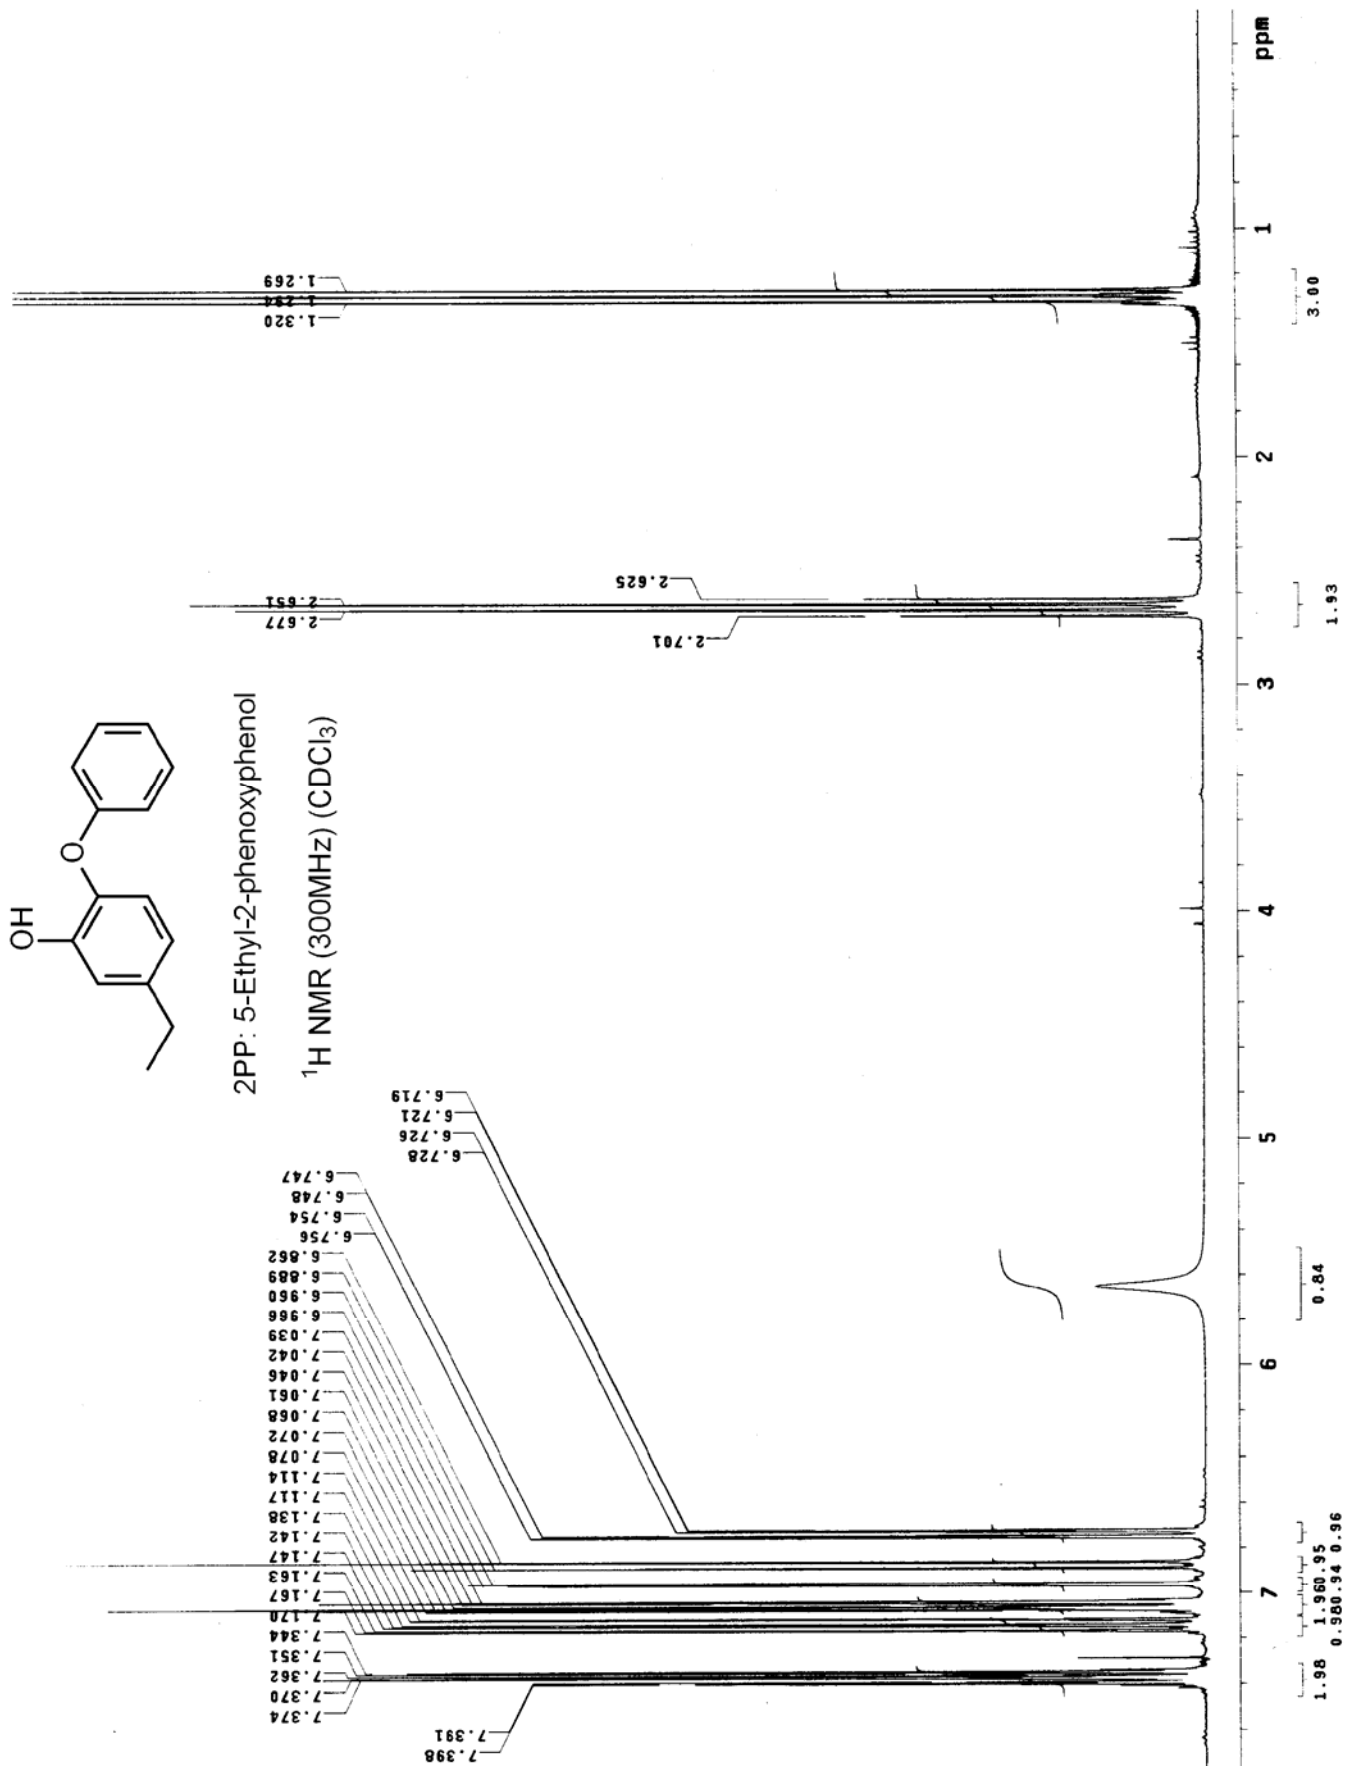

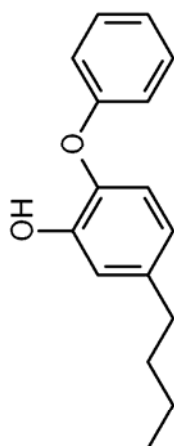

4PP: 5-Butyl-2-phenoxyphenol

$^1\text{H}$  NMR (300MHz) ( $\text{CDCl}_3$ )

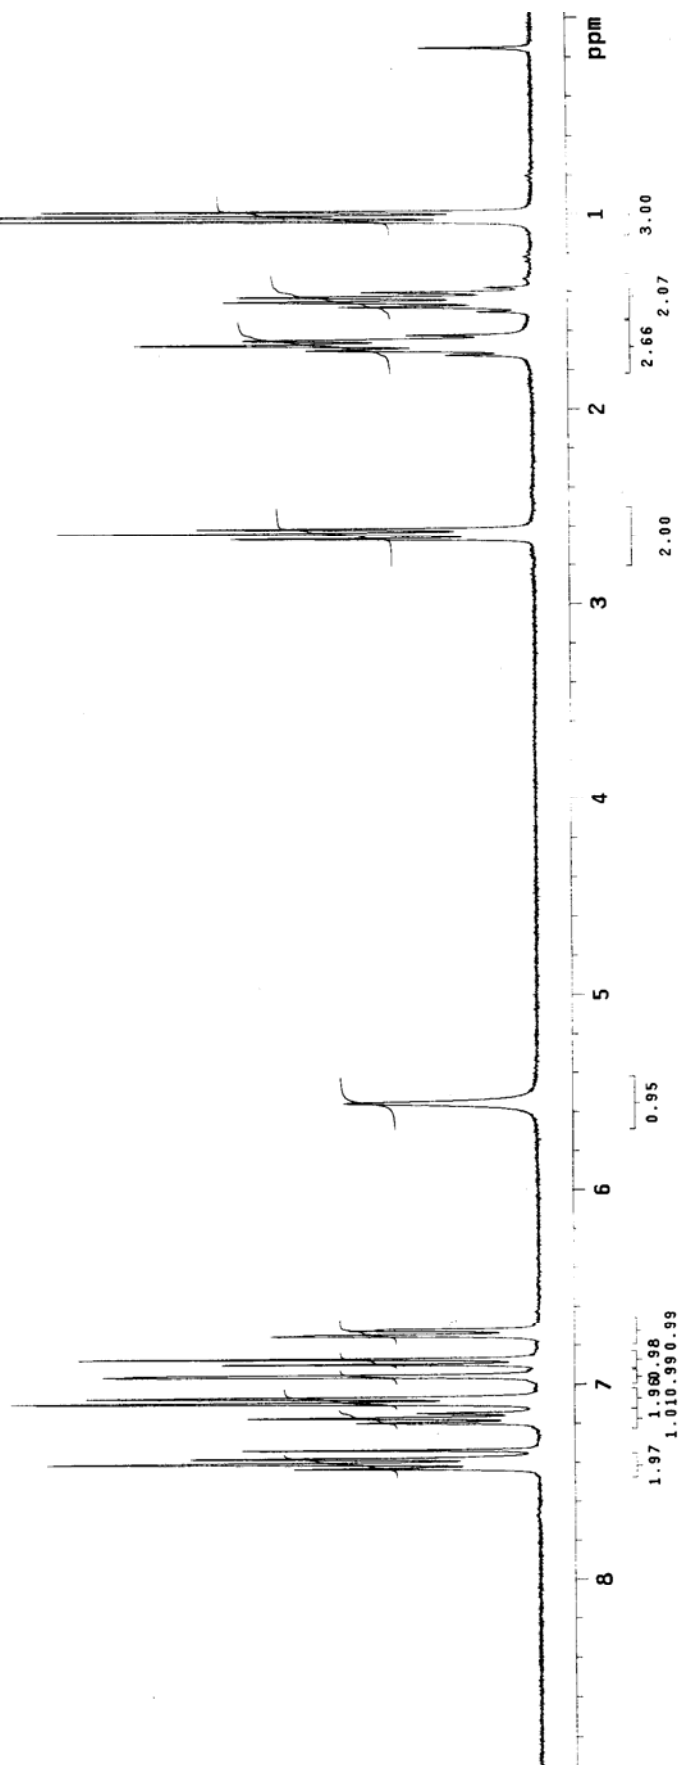

104



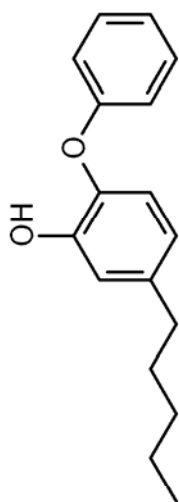

5PP: 5-Pentyl-2-phenoxyphenol

$^1\text{H}$  NMR (300MHz) ( $\text{CDCl}_3$ )

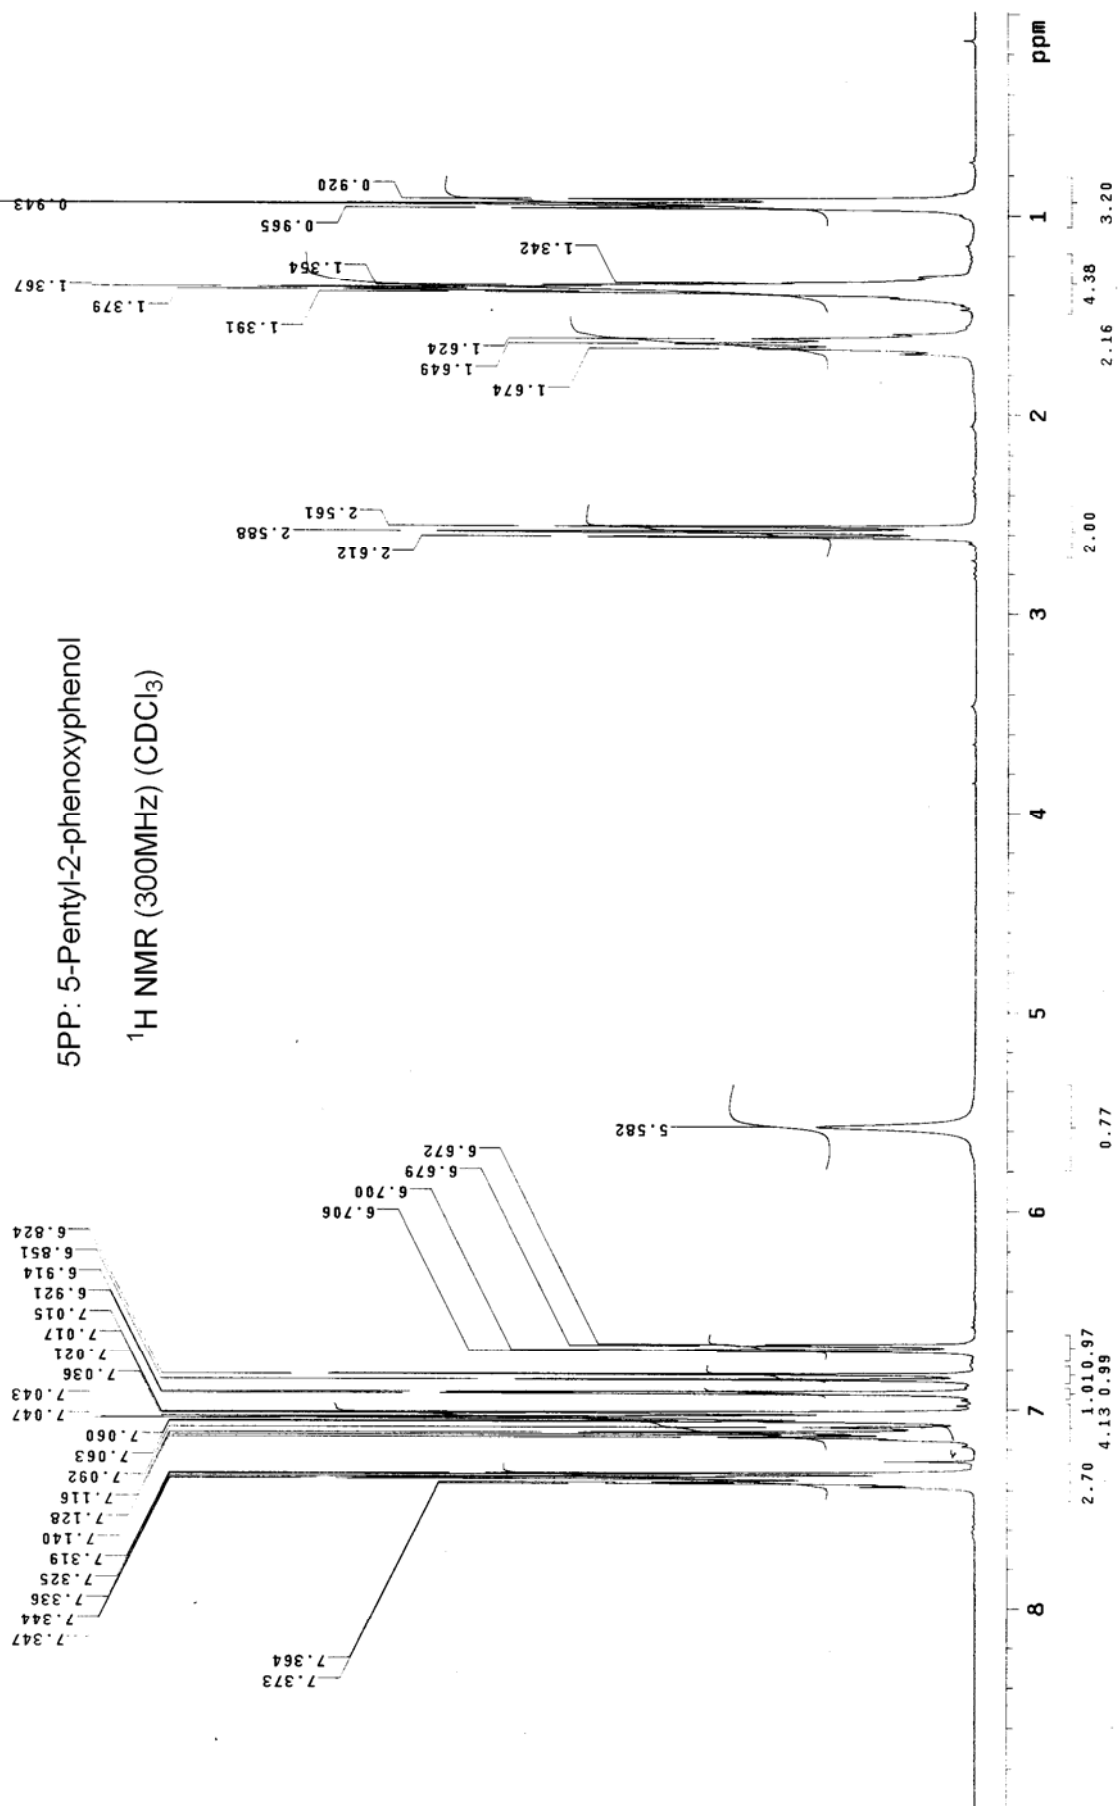

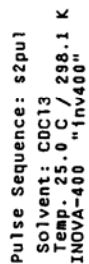

Relax. delay 1.000 sec  
Pulse 45.7 degrees  
Acq. time 3.744 sec  
Width 6000.6 Hz  
50 repetitions  
OBSERVE H1 399.837934  
DATA PROCESSING  
FT size 65536  
Total time 3 min, 57 sec

6PP: 5-Hexyl-2-phenoxyphenol

 $^1\text{H}$  NMR (300MHz) ( $\text{CDCl}_3$ )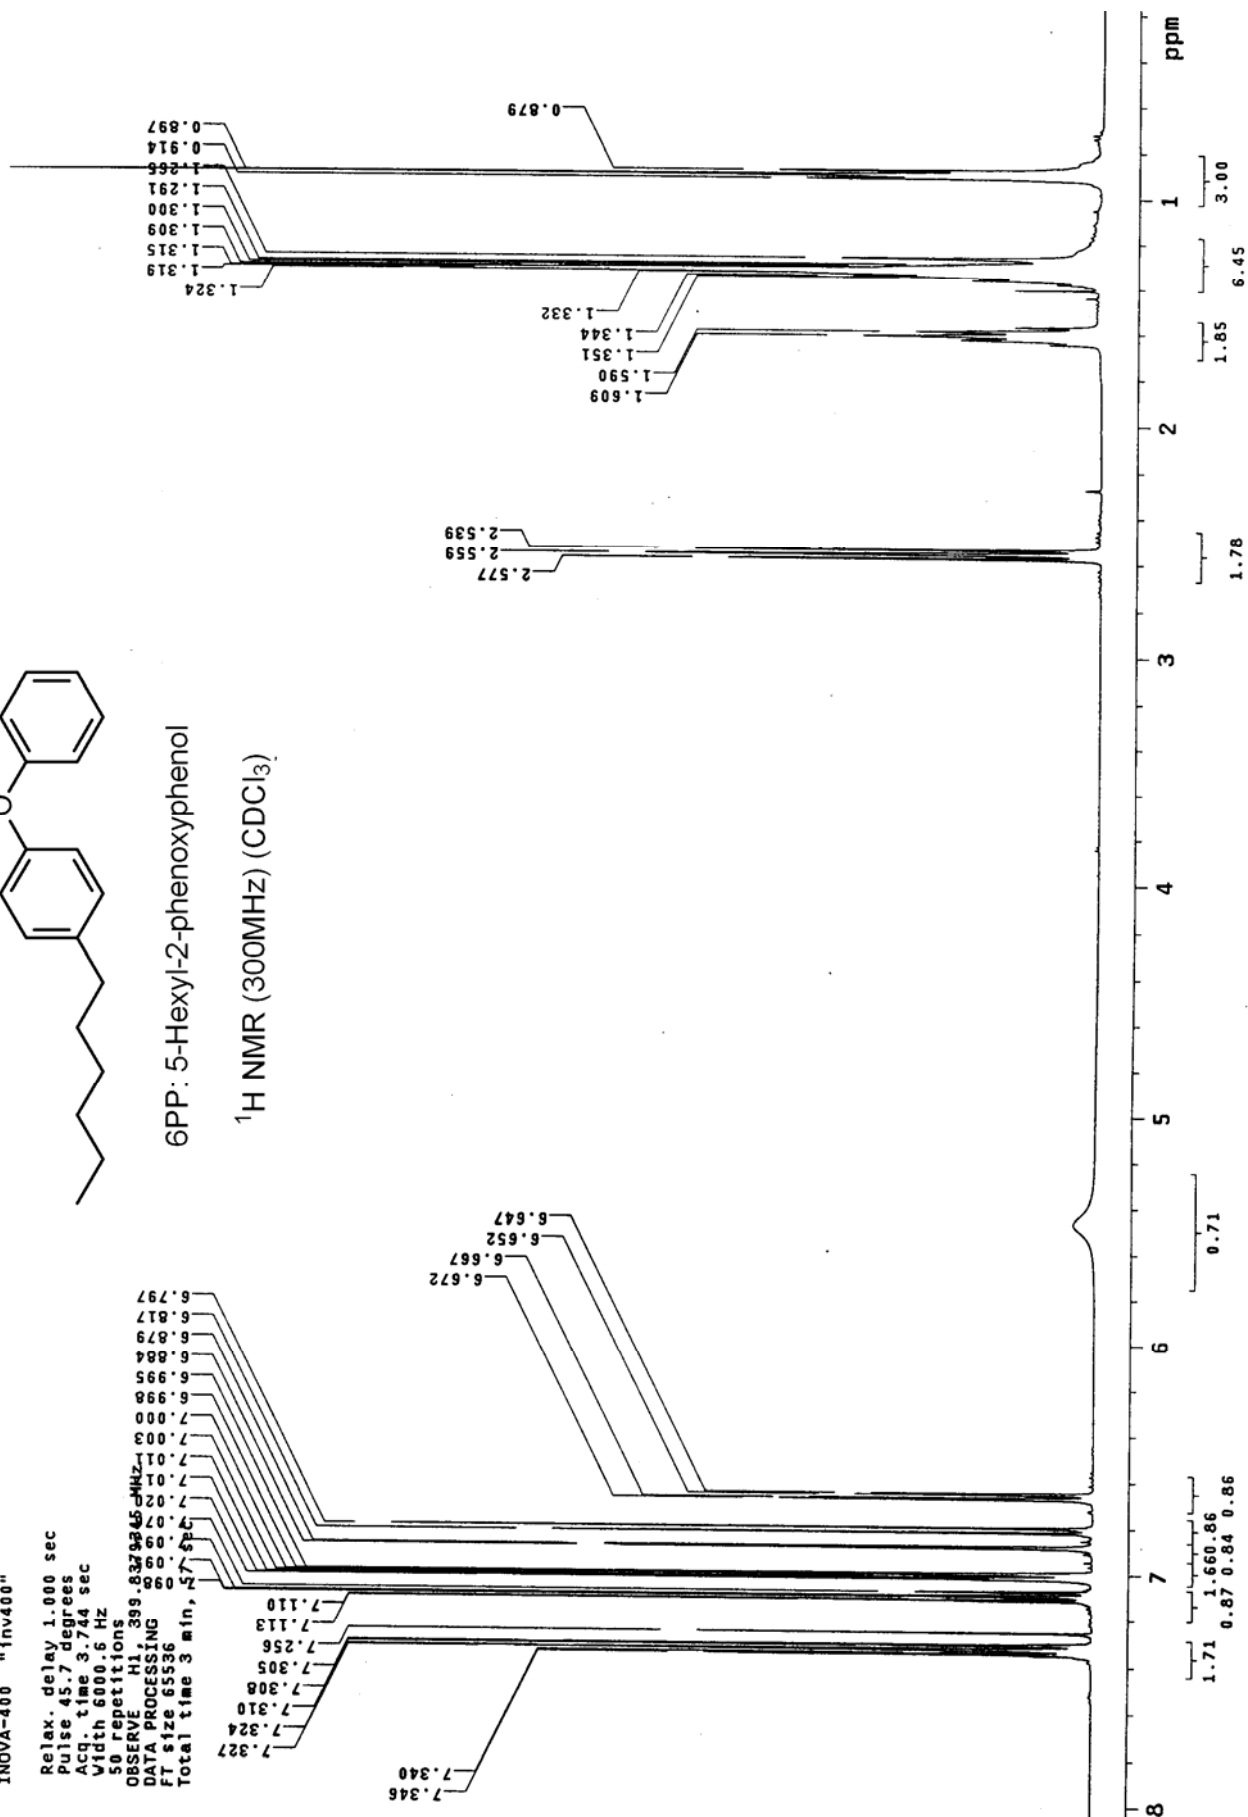

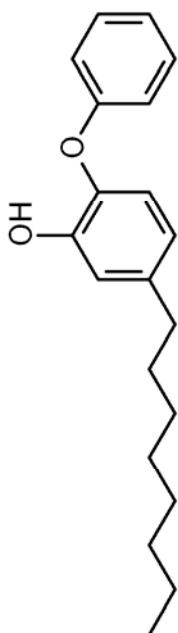

8PP: 5-Octyl-2-phenoxyphenol

<sup>1</sup>H NMR (300MHz) (CDCl<sub>3</sub>)

Pulse Sequence: s2pul  
Solvent: CDCl<sub>3</sub>  
Temp: 25.0 C / 298.1 K  
INOVIA-400 "1nv400"

Relax. delay 1.000 sec  
Pulse 45.7 degrees  
Acq. time 3.744 sec  
Width 6000.6 Hz  
50 repetitions

OBSERVED: 300.136 MHz  
DATA: 300.136 MHz  
FT: 300.136 MHz  
Total Time: 3.744 min

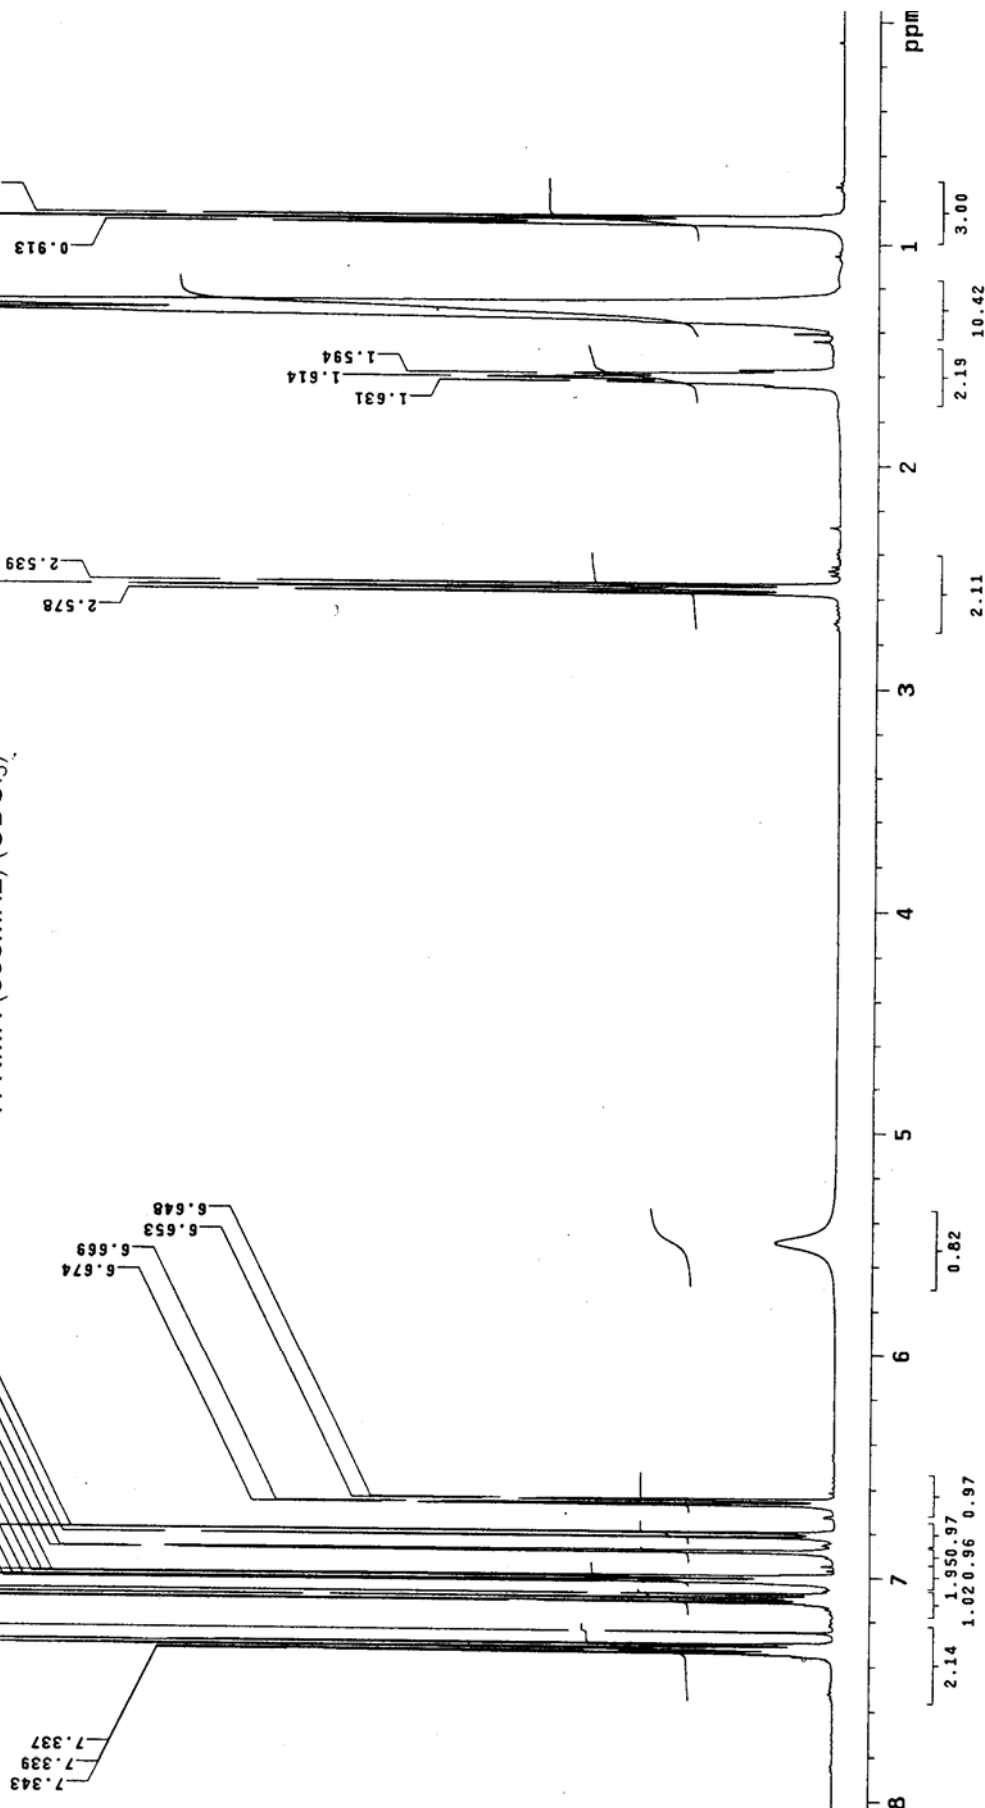

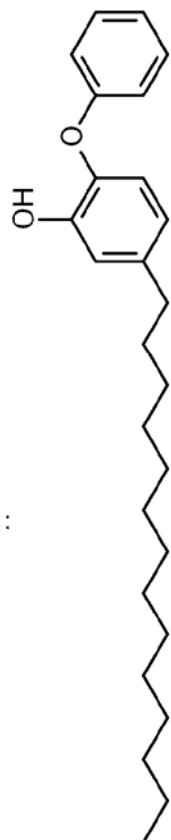

14PP: 5-Tetradecyl-2-phenoxyphenol

$^1\text{H}$  NMR (300MHz) ( $\text{CDCl}_3$ )

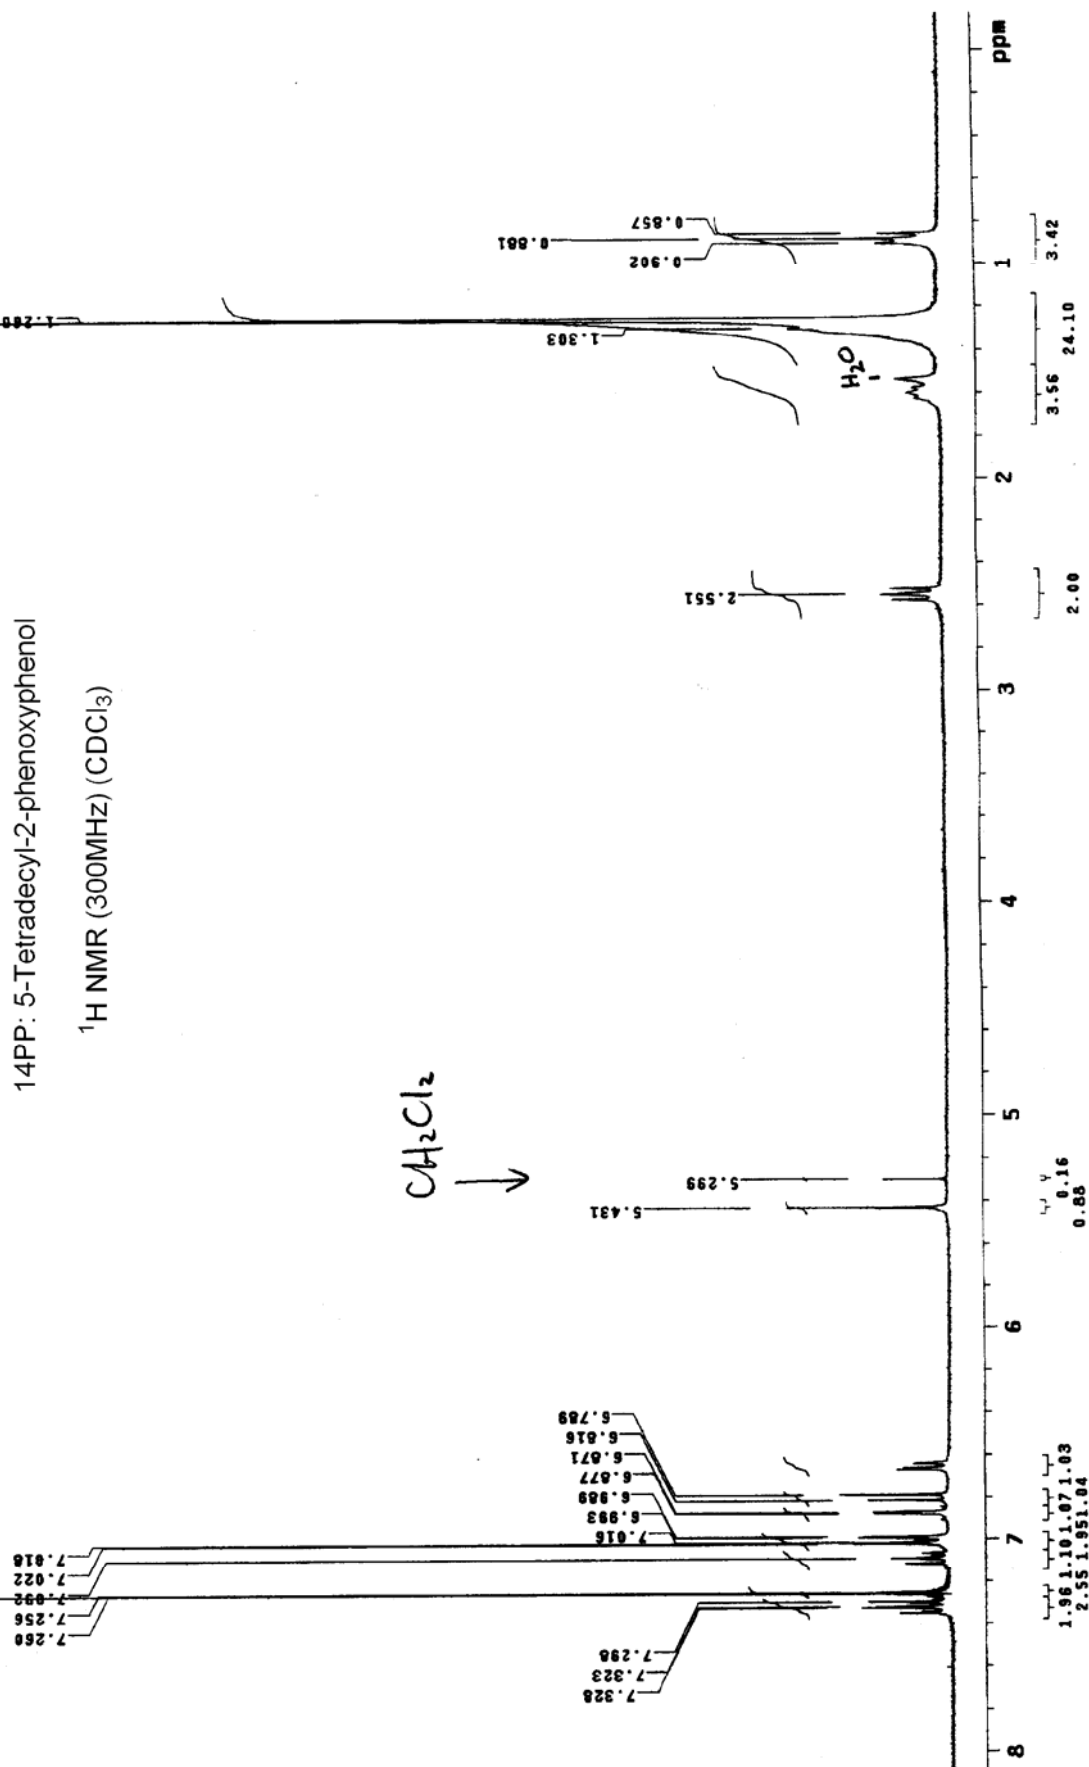

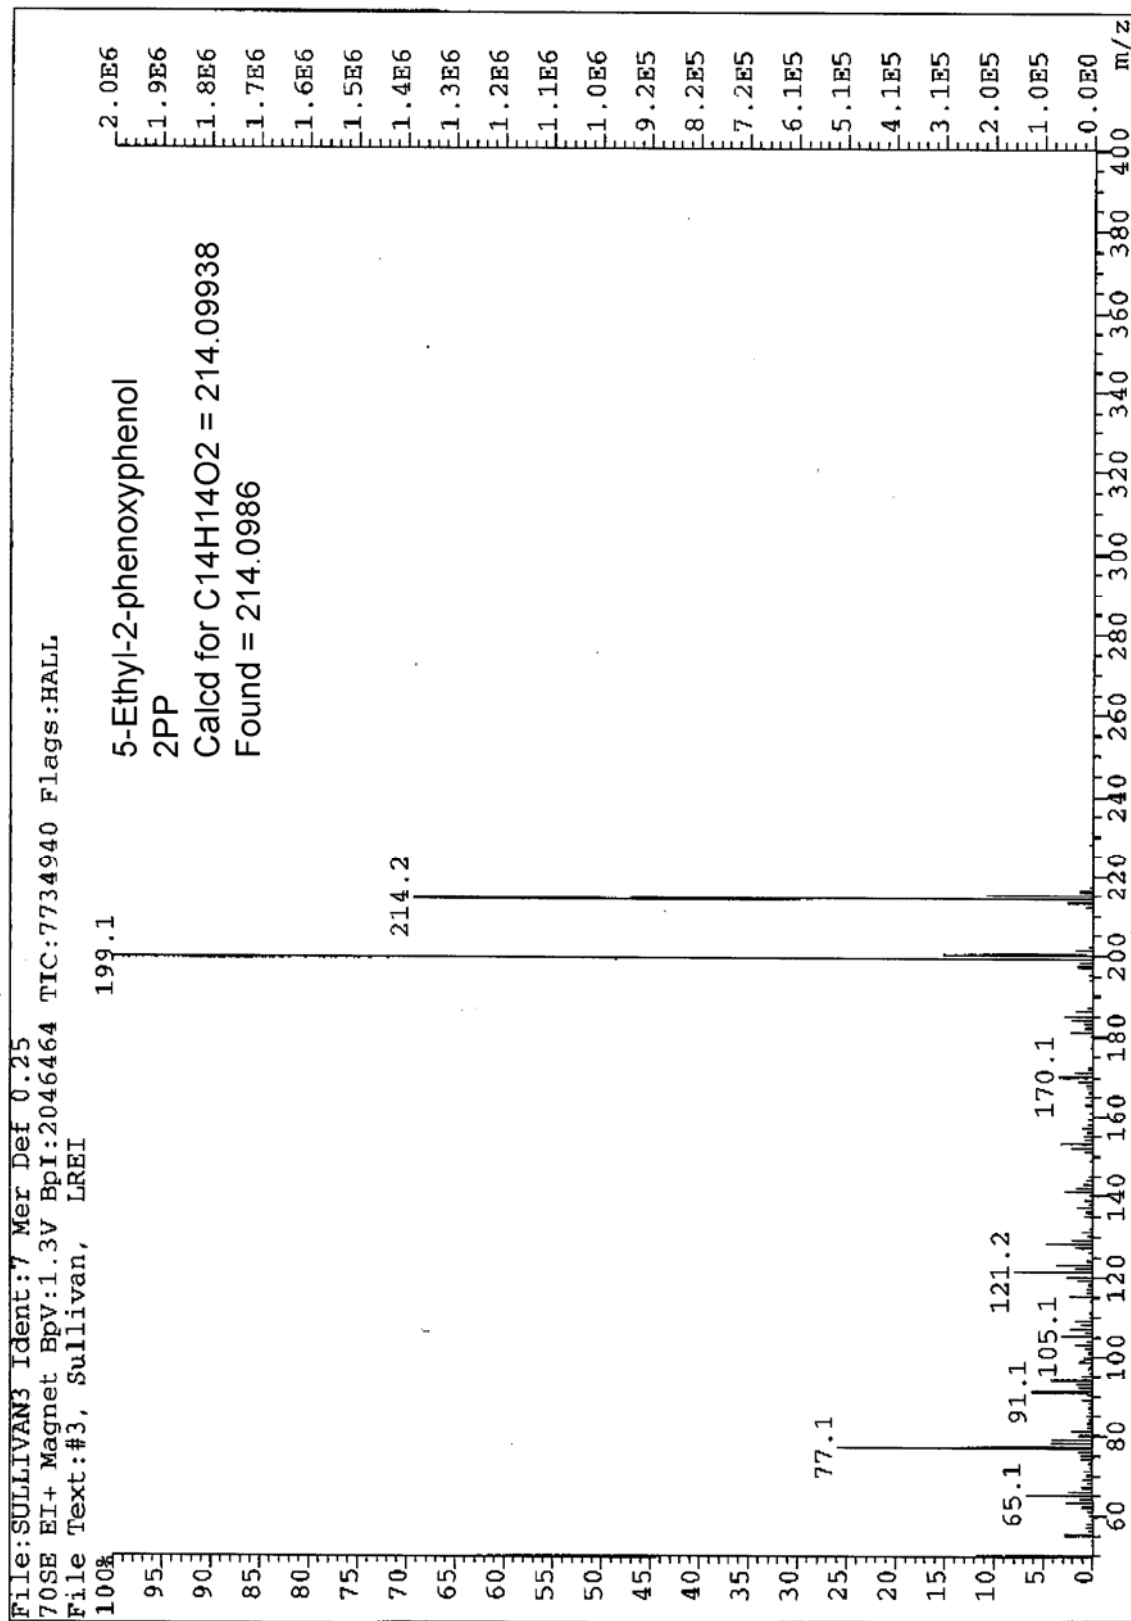

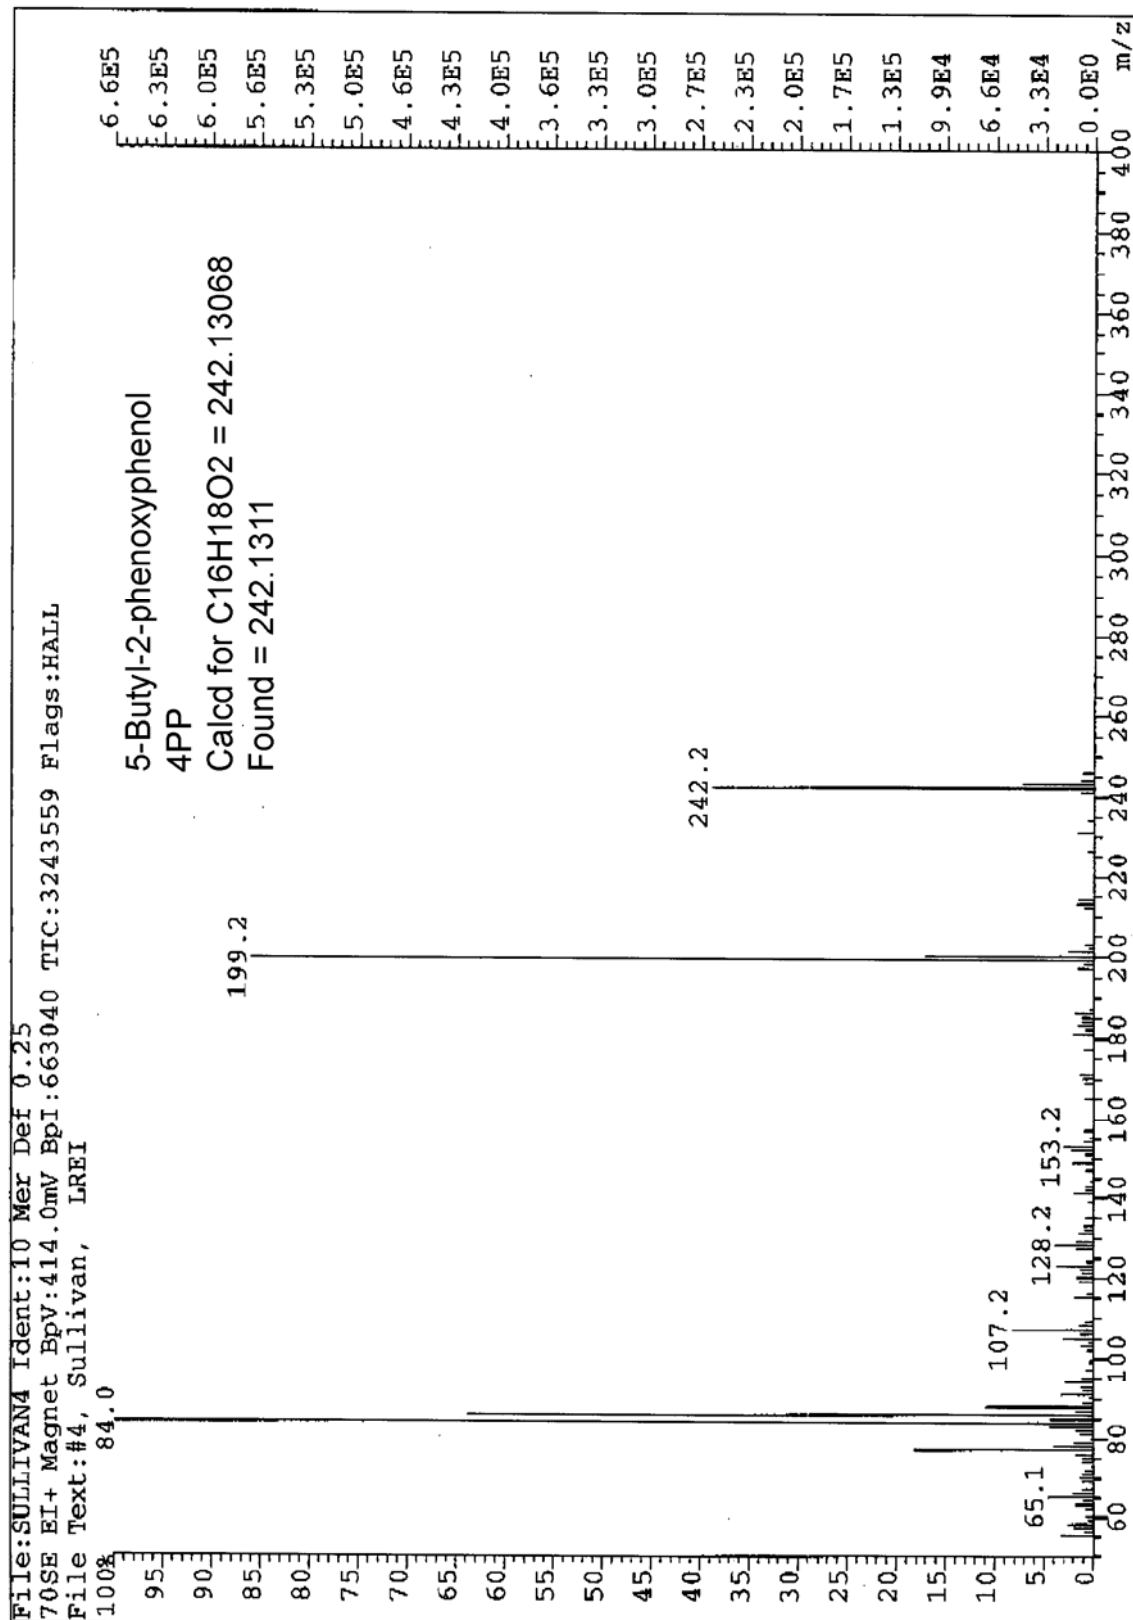

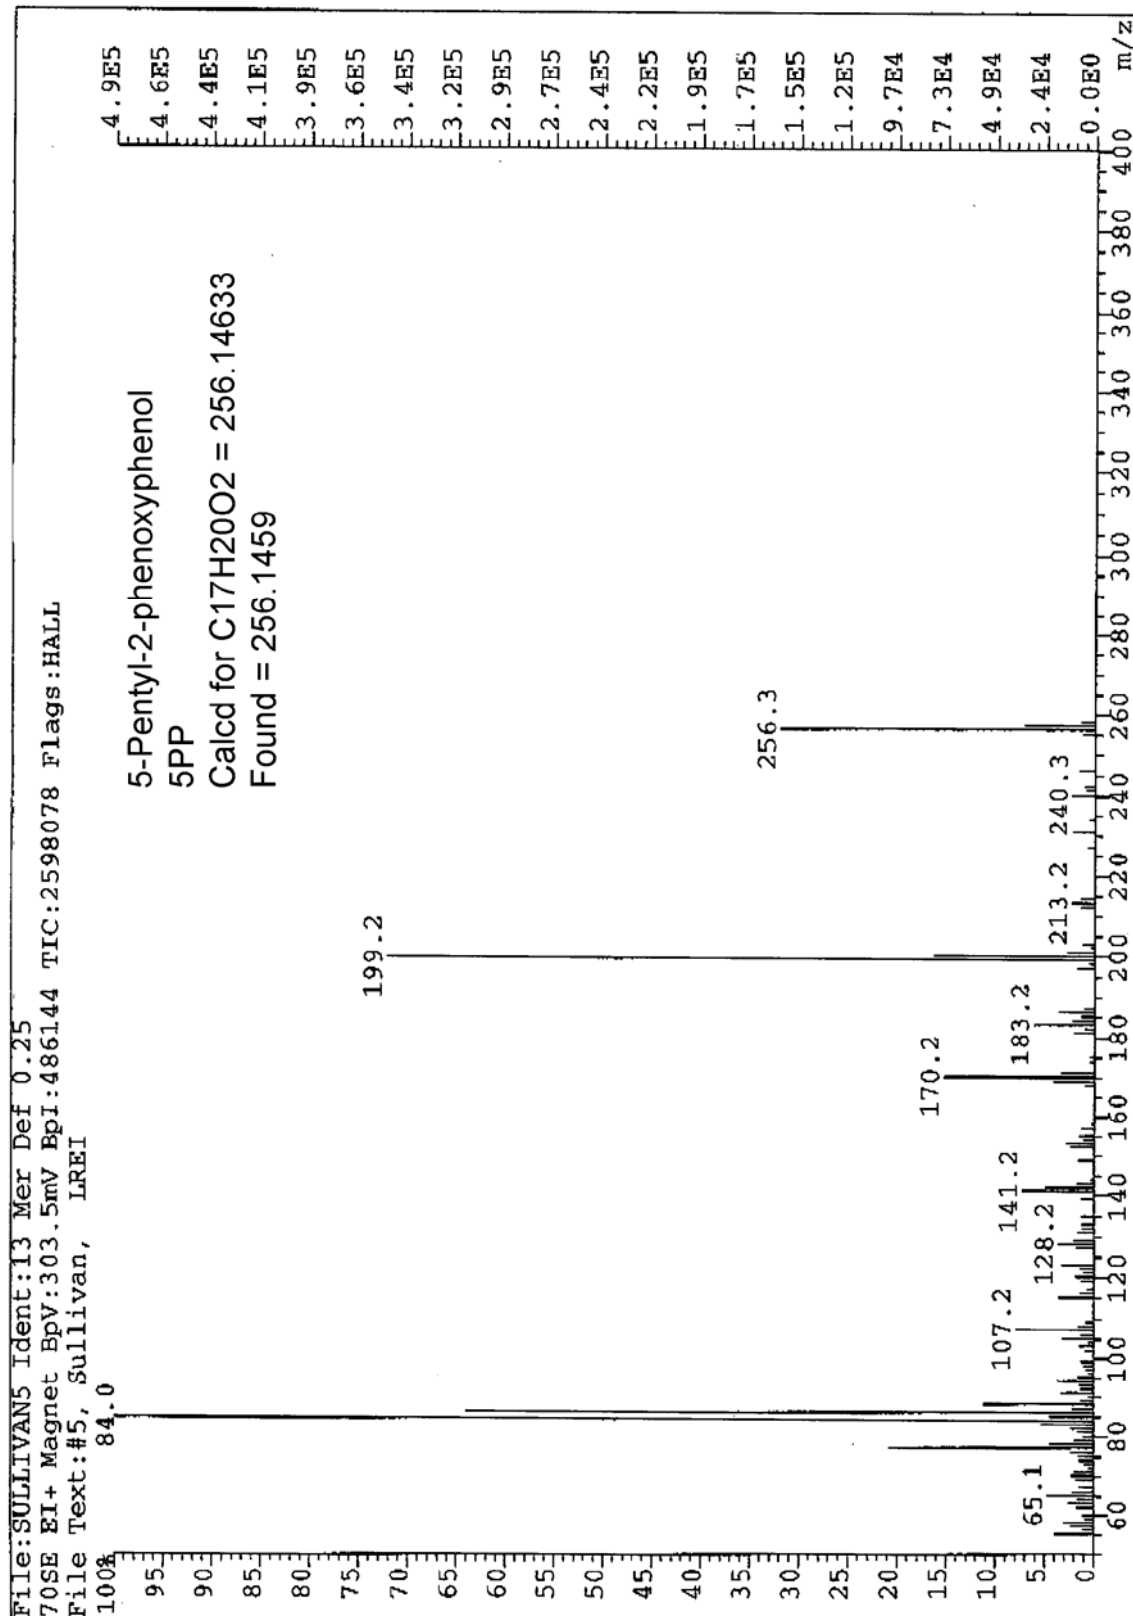

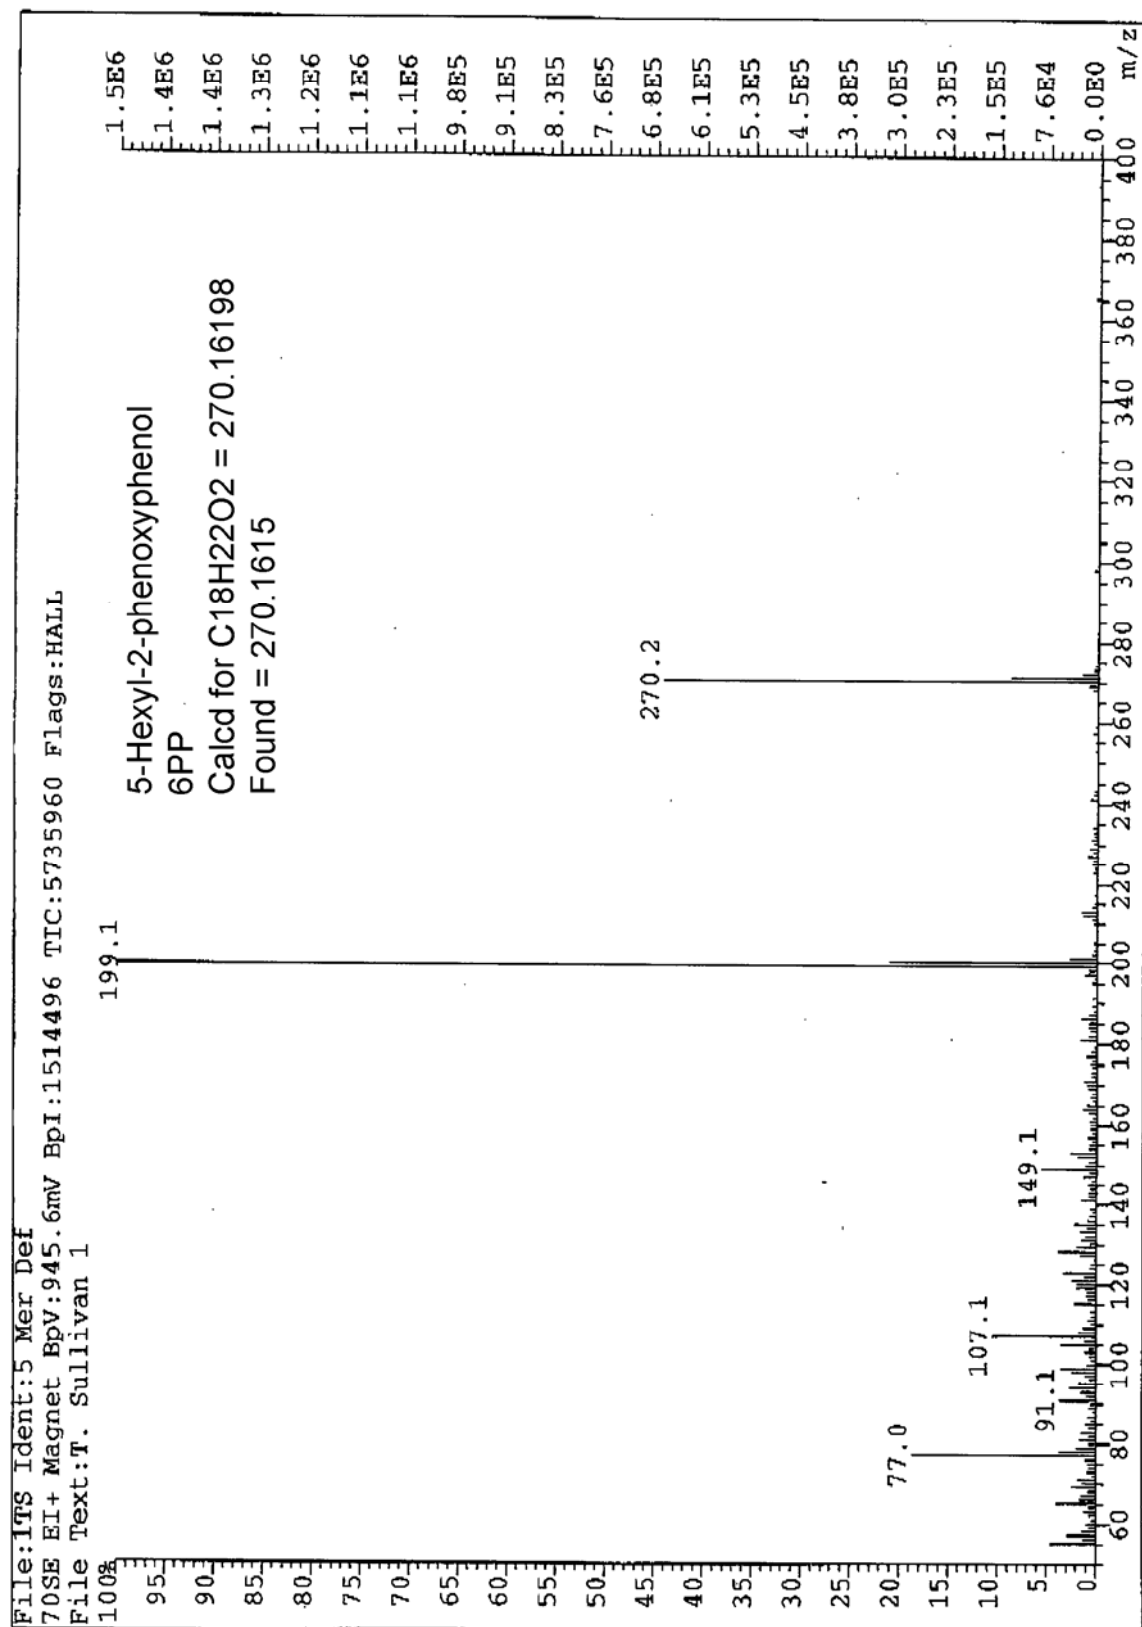



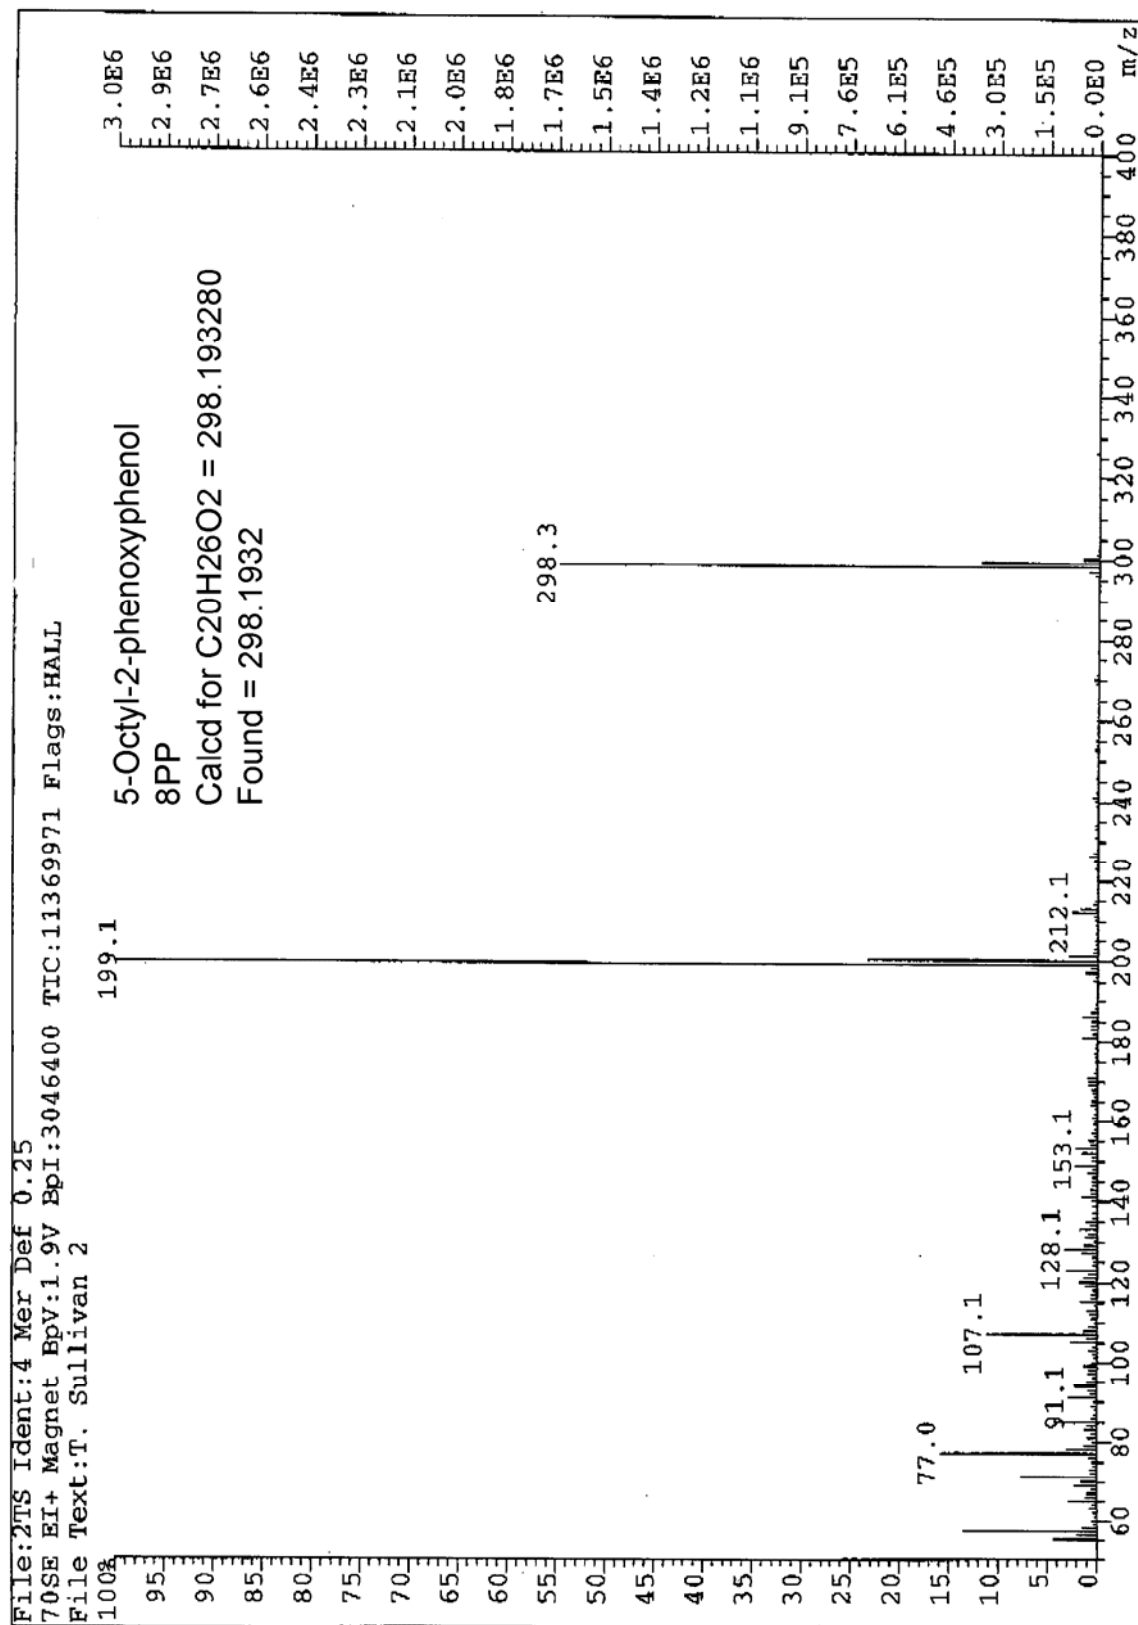

File:SULLIVAN6 Ident:11 Mer Def 0.25  
70SE EI+ Magnet BpV:167.1mV BpI:267648 TIC:1984454 Flags:HALL  
File Text:#6, Sullivan, LREI

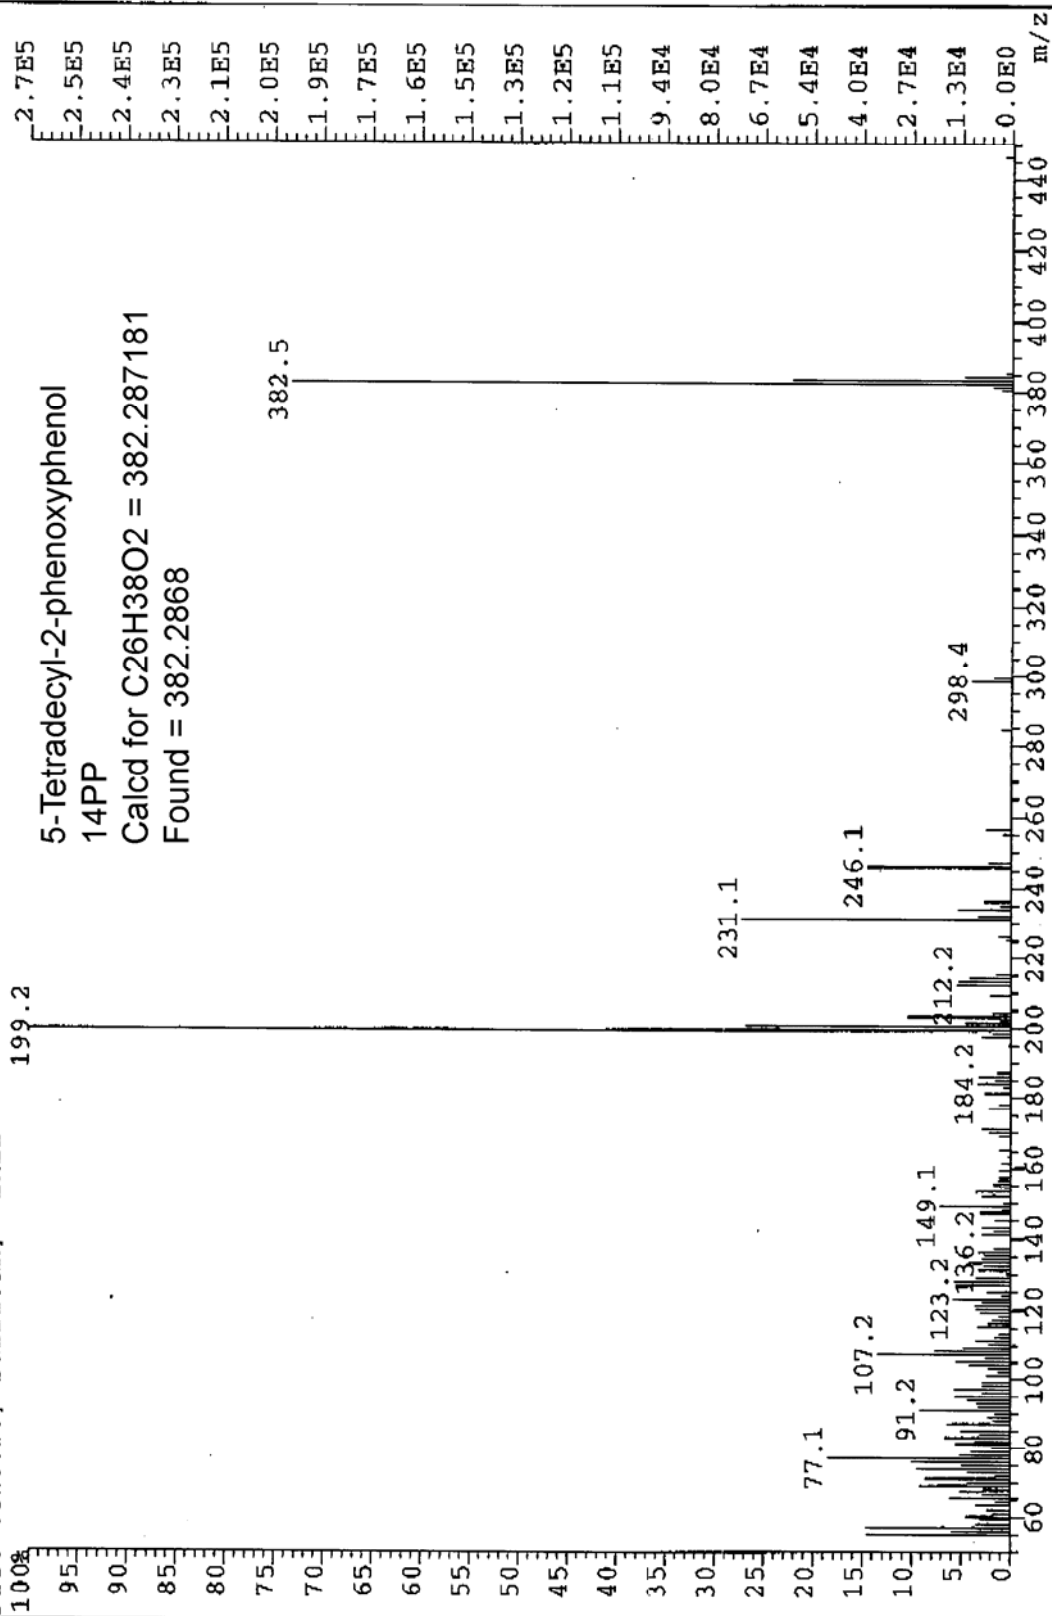

Supplement: Supplementary file 1 [file 5659266]
